# Supplementary material
Source: PubMed Central journal article supplement (PMC6136982)
Supplement: NIHMS932832-supplement-Supp_Mat.pdf [file NIHMS932832-supplement-Supp_Mat.pdf]

## Supplemental Figure Legends

**Supplemental 1.** Reagents and conditions for the vinyl iodide **10/11**. **(A)** (a) cat. H<sub>2</sub>SO<sub>4</sub>/acetone, 3h; (b) NaBH<sub>4</sub>/MeOH, 0 °C, 45 min; (c) NaIO<sub>4</sub>, THF/H<sub>2</sub>O (1/1), 3h; (d) Ph<sub>3</sub>PCHCO<sub>2</sub>Et/cat. PhCOOH, CH<sub>2</sub>Cl<sub>2</sub>, reflux, 12 h; (e) NaBH<sub>4</sub>, NiCl<sub>2</sub>·6H<sub>2</sub>O, MeOH, 0 °C, 1h; (f) DMSO, (COCl)<sub>2</sub>, NEt<sub>3</sub>, CH<sub>2</sub>Cl<sub>2</sub>, -78 °C, 1 h; (g) ClPh<sub>3</sub>PCH<sub>2</sub>CHO, NEt<sub>2</sub>, PhH, reflux, 12 h; (h) CHI<sub>3</sub>, CrCl<sub>2</sub>, THF, 3 h; (i) TFA/H<sub>2</sub>O/THF. Reagents and conditions for synthesis of Wittig terminal alkyne **14**. **(B)** (a) I<sub>2</sub>, imidazole, PPh<sub>3</sub>, CH<sub>2</sub>Cl<sub>2</sub>, 4 h; (b) PPh<sub>3</sub>, MeCN, reflux, 12h. **(C)** Reagents and conditions for the acetaldehyde precursor **22** (a) cat. PTSA-H<sub>2</sub>O/DHP, 5 min; (b) 1-butyne, n-BuLi, BF<sub>3</sub>-OEt<sub>2</sub>, THF, 3 h; (c) TBDMS-Cl, Imidazole, DMF, 3 h; (d) Ni(OAc)<sub>2</sub>·4H<sub>2</sub>O, NaBH<sub>4</sub>, H<sub>2</sub>NCH<sub>2</sub>CH<sub>2</sub>NH<sub>2</sub>, H<sub>2</sub>, EtOH, 12 h; (e) MgBr<sub>2</sub>, Et<sub>2</sub>O, 4 h; (f) DMSO, (COCl)<sub>2</sub>, NEt<sub>3</sub>, CH<sub>2</sub>Cl<sub>2</sub>, 0.5 h; (g) ClPh<sub>3</sub>PCH<sub>2</sub>CHO, NEt<sub>3</sub>, PhH, 12 h. **(D)** Reagents and conditions for the terminal alkyne building block **24** (a) NaHMDS, THF, -78°C, 3 h; (b) TBAF, THF, 40°C, 48 h. **(E)** Reagents and conditions for the final coupling **RvD4**. (a) Pd[PPh<sub>3</sub>]<sub>4</sub>, CuI, n-BuNH<sub>2</sub>, PhH, 12 h; (b) Zn(Cu/Ag), MeOH (aq), 40°C, 12 h; (c) K<sub>2</sub>CO<sub>3</sub>, MeOH, 12 h.

**Supplemental 2.** 1D-<sup>1</sup>H NMR spectroscopy was carried out in CD<sub>3</sub>OD at 400 MHz. Figure subset shows the olefinic region and *J* coupling values for complete structural confirmation of synthetic RvD4 to be 4*S*,5*R*,17*S*-trihydroxydocosa- 6*E*,8*E*,10*Z*,13*Z*,15*E*-hexaenoic acid.

**Supplemental 3.** Conversion of RvD4 to its trans isomers. **(A)** RvD4 was treated in DME with 1M LiOH base and glutathione for 26hr. **(B)** Conversion of RvD4 was monitored by HPLC and characteristic UV-Vis absorption spectra to **(C)** 10*E* Resolvin D4 and **(D)** 10*E*, 13*E*, Resolvin D4.
