# Supplementary material
Source: PubMed Central journal article supplement (PMC6136982)

# Supplemental 2

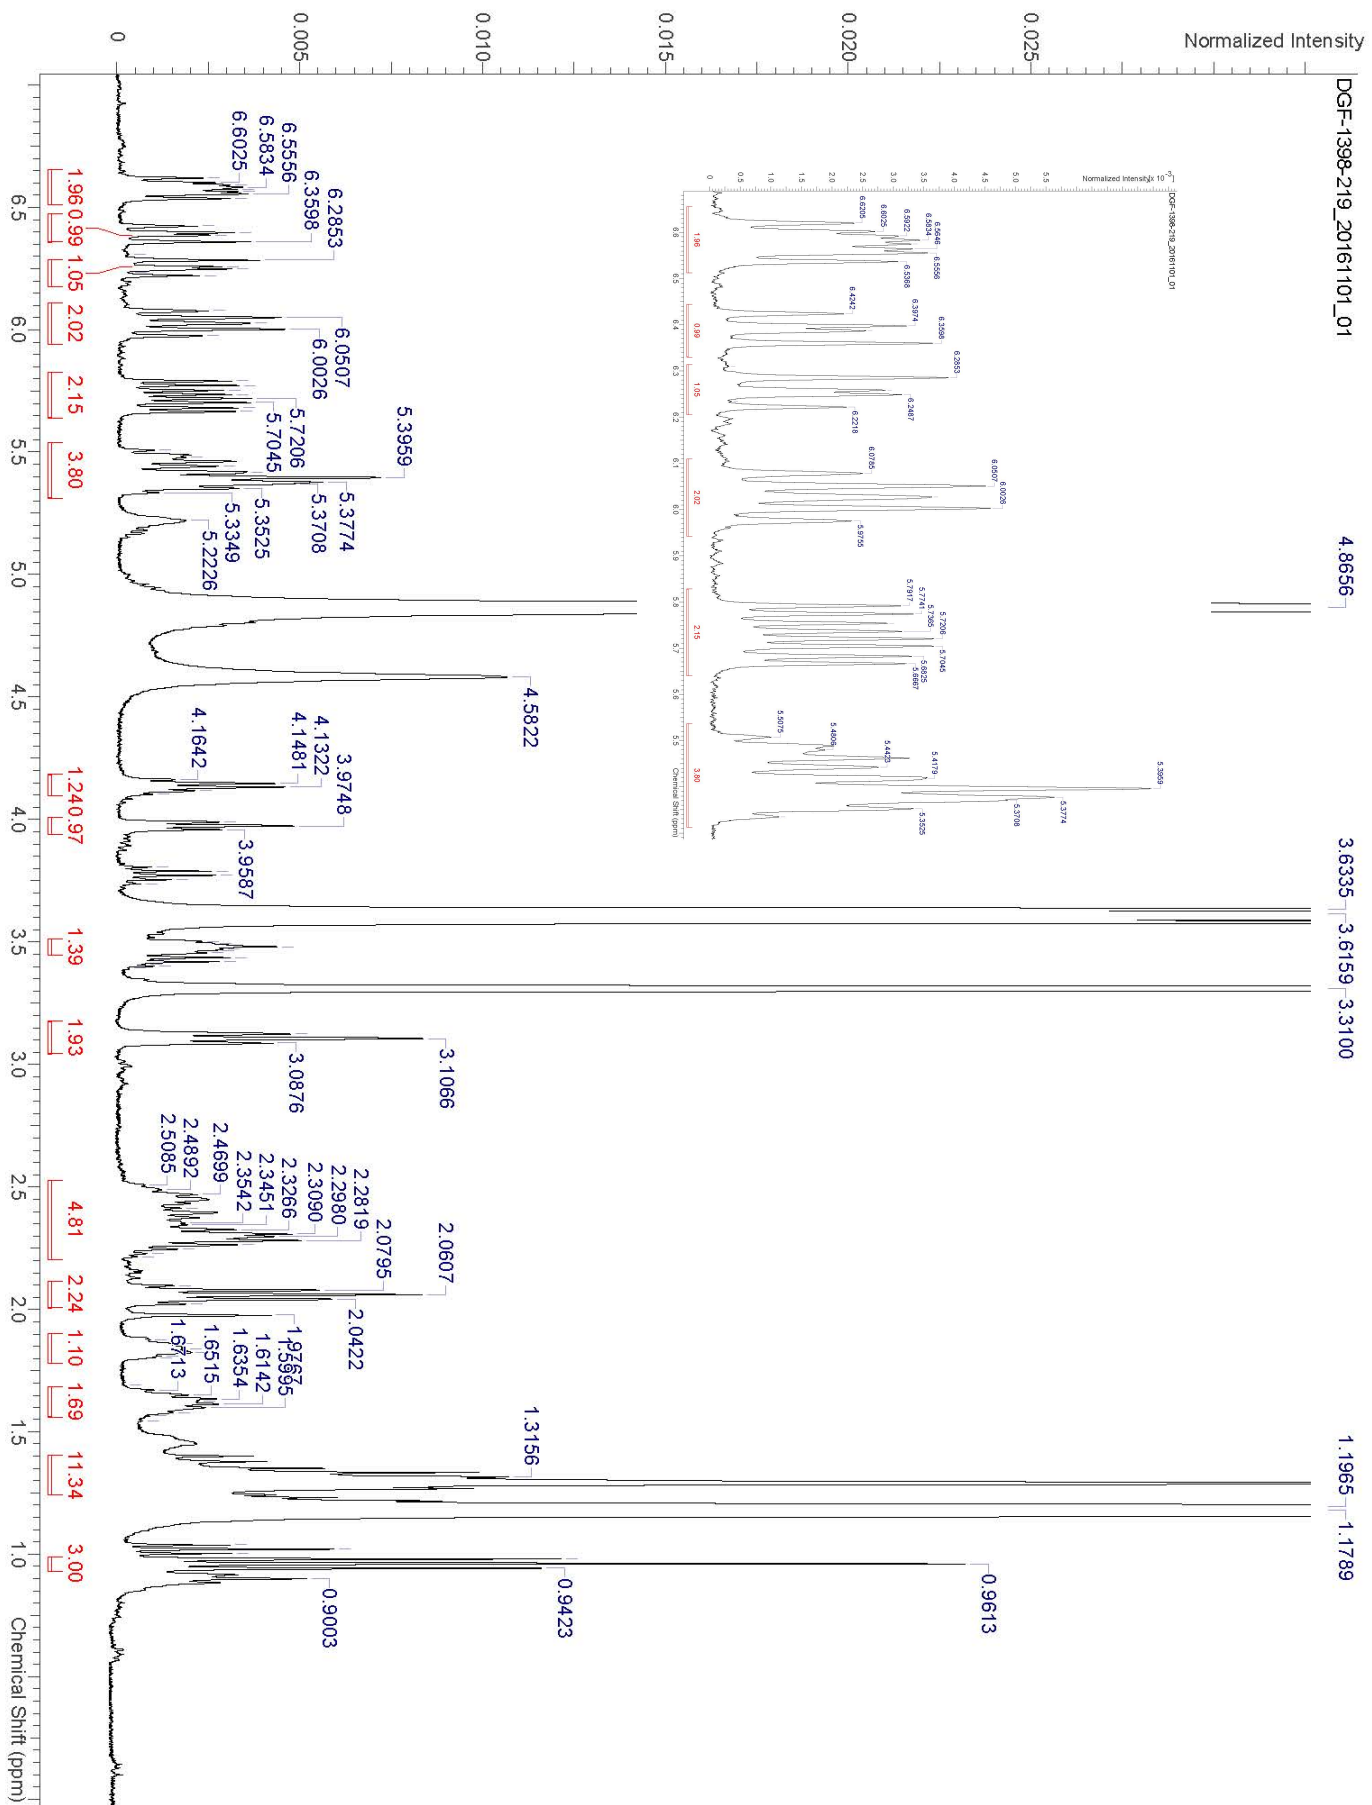

Supplement: NIHMS932832-supplement-Supp_FigS2.pdf [file NIHMS932832-supplement-Supp_FigS2.pdf]

**A**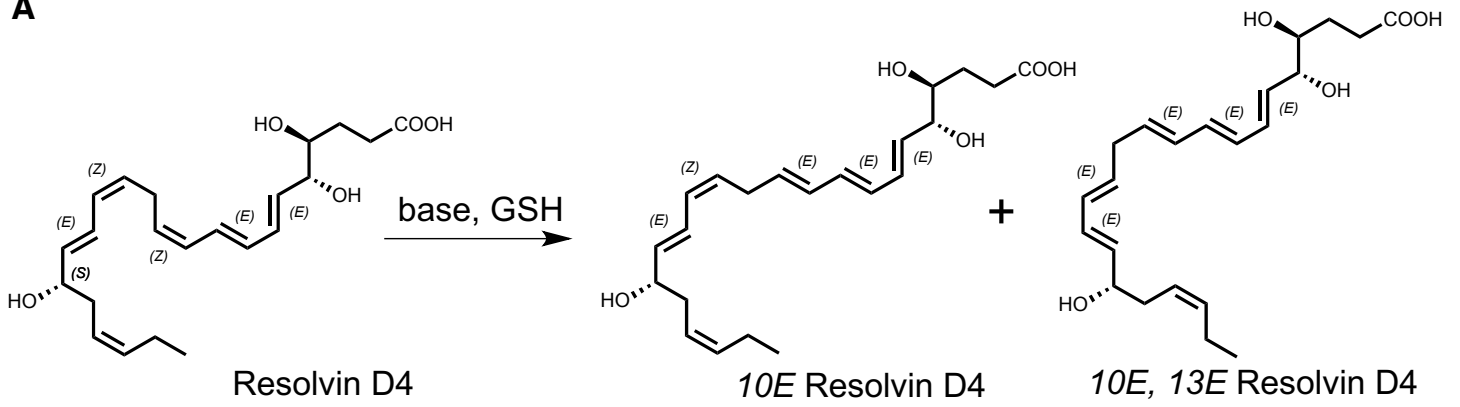**B**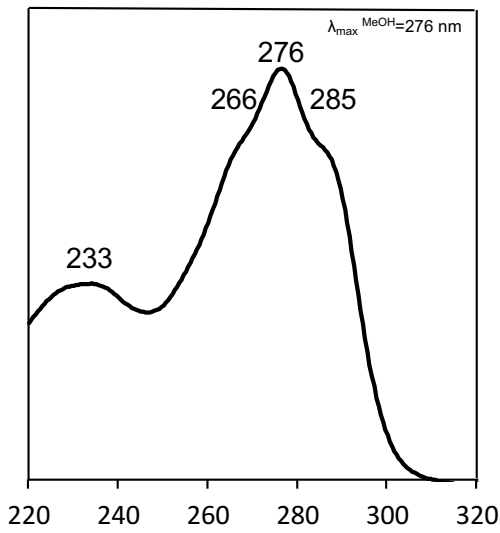**C**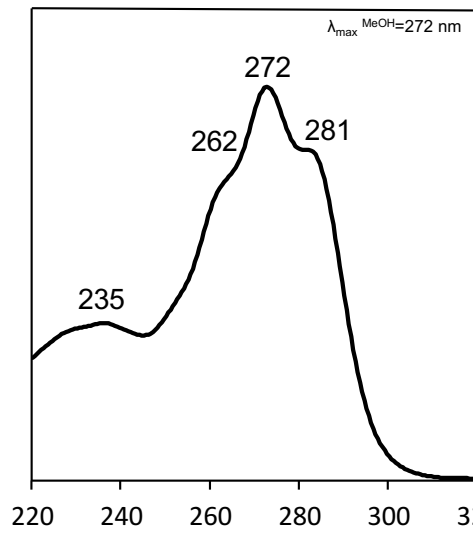**D**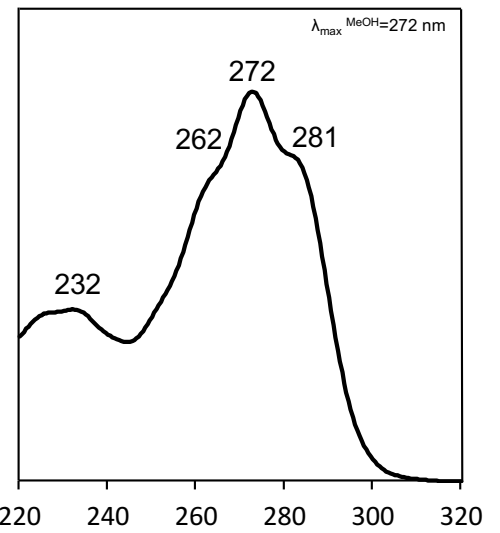

Supplement: NIHMS932832-supplement-Supp_FigS3.pdf [file NIHMS932832-supplement-Supp_FigS3.pdf]
